# Supplementary material for: Essential Trace Elements Status in Portuguese Pregnant Women and Their Association with Maternal and Neonatal Outcomes: A Prospective Study from the IoMum Cohort
Source: MDPI journal article supplement (doi:10.3390/biology12101351), 2023-10-21
Supplement: s1 [file s1]

**Table S1.** Multimineral and vitamin content of supplements reported to be used by participants.

|           | RDD                     | Omega-3         | Vitamins |      |      |      |      |         |      |      |      |      |      |       |      |      | Minerals |      |      |      |      |      |      |      |      |      |      |      |
|-----------|-------------------------|-----------------|----------|------|------|------|------|---------|------|------|------|------|------|-------|------|------|----------|------|------|------|------|------|------|------|------|------|------|------|
|           |                         | (DHA/EPA)       | B6       | B5   | B3   | B2   | B1   | B8 e B7 | B9   | B12  | C    | A    | D    | E     | K    | I    | Fe       | Zn   | Mg   | Cu   | P    | Mn   | K    | Ca   | Mo   | Cr   | Se   | Co   |
|           |                         | (mg)            | (mg)     | (mg) | (mg) | (mg) | (mg) | (mg)    | (µg) | (µg) | (mg) | (µg) | (µg) | (mg)  | (µg) | (µg) | (mg)     | (mg) | (mg) | (µg) | (mg) | (mg) | (µg) | (mg) | (µg) | (µg) | (µg) | (µg) |
| MV/MMF 1  | 1 cap                   | 200             | 2        | 3    | 16   | 1.6  | 0.7  | 75      | 400  | 2    | 30   | 300  | 10   | 5     | 35   | 150  | 30       | 7    | 0    | 600  | 0    | 0    | 0    | 0    | 0    | 0    | 55   | 0    |
| MV/MMF 2  | 1 pill                  | 0               | 2.1      | 6    | 16   | 2.1  | 1.8  | 50      | 300  | 3    | 80   | 800  | 5    | 12    | 30   | 100  | 0        | 5    | 0    | 500  | 124  | 2    | 0    | 160  | 0    | 0    | 30   | 0    |
| MV/MMF 3  | 1 cap                   | 200             | 1.4      | 6    | 16   | 1.4  | 1.1  | 50      | 400  | 2.5  | 40   | 0    | 10   | 0     | 10   | 200  | 28       | 10   | 0    | 0    | 0    | 0    | 0    | 0    | 0    | 0    | 55   | 0    |
| MV/MMF 4  | 1 cap                   | 260 (31.2/46.8) | 4        | 6    | 18   | 1.6  | 1.4  | 150     | 500  | 2.5  | 60   | 0    | 0    | 22.38 | 0    | 200  | 28       | 3.75 | 166  | 500  | 0    | 1    | 134  | 0    | 0    | 0    | 55   | 0    |
| MV/MMF 5  | 1 pill                  | 0               | 0        | 0    | 0    | 0    | 0    | 0       | 400  | 2    | 0    | 0    | 0    | 0     | 0    | 0    | 0        | 0    | 0    | 0    | 0    | 0    | 0    | 0    | 0    | 0    | 0    | 0    |
| MV/MMF 6  | 14 g of powder + 3 caps | 360 (300/40)    | 5        | 18   | 36   | 3.5  | 3    | 150     | 500  | 9    | 110  | 2000 | 5    | 50    | 60   | 150  | 5        | 5    | 180  | 1000 | 0    | 0    | 0    | 400  | 80   | 60   | 30   | 0    |
| MV/MMF 7  | 1 pill                  | 0               | 10       | 6    | 20   | 5    | 8    | 150     | 400  | 20   | 90   | 0    | 20   | 0     | 0    | 150  | 14       | 15   | 60   | 1000 | 0    | 0    | 0    | 0    | 0    | 0    | 50   | 0    |
| MV/MMF 8  | 1 pill                  | 0               | 10       | 6    |      | 2    | 3    | 150     | 400  | 6    | 70   | 0    | 10   | 0     | 70   | 150  | 17       | 15   | 150  | 1000 | 0    | 0    | 0    | 0    | 0    | 0    | 30   | 0    |
| MV/MMF 9  | 1 pill                  | 0               | 2.4      | 0    | 20   | 1.7  | 1.4  | 0       | 400  | 6    | 60   | 1500 | 10   | 0     | 0    | 150  | 18       | 0    | 100  | 0    | 0    | 0    | 0    | 125  | 0    | 0    | 0    | 0    |
| MV/MMF 10 | 2 pills                 | 0               | 1.25     | 5    | 10   | 1    | 0.85 | 150     | 400  | 4    | 50   | 1800 | 5    | 10    | 0    | 75   | 14       | 11.5 | 227  | 1000 | 0    | 0.5  | 0    | 652  | 0    | 12.5 | 12.5 | 0    |
| MV/MMF 11 | 1 pill                  | 0               | 0        | 0    | 0    | 0    | 0    | 0       | 350  | 0    | 0    | 0    | 0    | 0     | 0    | 0    | 100      | 0    | 0    | 0    | 0    | 0    | 0    | 0    | 0    | 0    | 0    | 0    |
| MV/MMF 12 | 1 cap                   | 100             | 1.4      | 0    | 0    | 0    | 0    | 0       | 500  | 2.5  | 80   | 800  | 5    | 12    | 0    | 200  | 30       | 0    | 0    | 0    | 0    | 0    | 0    | 200  | 0    | 0    | 20   | 0    |
| MV/MMF 13 | 1 pill                  | 0               | 0        | 0    | 0    | 0    | 0    | 0       | 1000 | 0    | 0    | 0    | 0    | 0     | 0    | 0    | 90       | 0    | 0    | 0    | 0    | 0    | 0    | 0    | 0    | 0    | 0    | 0    |
| MV/MMF 14 | 1 cap + 1 pill          | 477 (300/33)    | 1.4      | 6    | 16   | 1.4  | 1.1  | 50      | 400  | 2.5  | 20   | 0    | 0    | 12    | 0    | 200  | 28       | 10   | 0    | 0    | 0    | 0    | 0    | 61.6 | 0    | 0    | 0    | 0    |
| MV/MMF 15 | 1 pill                  | 0               | 0        | 0    | 0    | 0    | 0    | 0       | 400  | 2    | 0    | 0    | 0    | 0     | 0    | 200  | 0        | 0    | 0    | 0    | 0    | 0    | 0    | 0    | 0    | 0    | 0    | 0    |
| MV/MMF 16 | 1 cap                   | 100             | 1.4      | 0    | 0    | 0    | 0    | 0       | 500  | 2.5  | 80   | 800  | 5    | 12    | 0    | 200  | 30       | 0    | 0    | 0    | 0    | 0    | 0    | 200  | 0    | 0    | 20   | 0    |
| MV/MMF 17 | 1 cap                   | 46              | 1.4      | 0    | 16   | 1.4  | 1.1  | 50      | 500  | 2.6  | 0    | 0    | 5    | 0     | 0    | 0    | 30       | 0    | 0    | 1000 | 0    | 2    | 0    | 0    | 0    | 0    | 60   | 0    |
| MV/MMF 18 | 1 cap                   | 250             | 1.4      | 6    | 16   | 1.4  | 1.1  | 50      | 400  | 2.5  | 80   | 0    | 5    | 12    | 0    | 200  | 14       | 10   | 45   | 500  | 18   | 1    | 0    | 24   | 0    | 0    | 0    | 0    |
| MV/MMF 19 | 2 sachets               | 0               | 0.7      | 0    | 0    | 0    | 0    | 0       | 400  | 0    | 0    | 0    | 10   | 0     | 0    | 0    | 0        | 5    | 0    | 0    | 0    | 2    | 0    | 0    | 0    | 0    | 0    | 0    |
| MV/MMF 20 | 1 cap                   | 0               | 0        | 0    | 0    | 0    | 0    | 0       | 400  | 0    | 0    | 0    | 0    | 0     | 0    | 200  | 0        | 0    | 0    | 0    | 0    | 0    | 0    | 0    | 0    | 0    | 0    | 0    |
| MV/MMF 21 | 1 cap                   | 240 (200/40)    | 2        | 6    | 18   | 1.6  | 1.4  | 150     | 500  | 2.6  | 80   | 0    | 5    | 15    | 0    | 200  | 28       | 10   | 100  | 1000 | 0    | 1.09 | 0    | 0    | 0    | 0    | 60   | 0    |

|           |        |              |   |   |    |     |     |     |     |     |    |   |   |    |   |     |    |    |     |      |   |      |   |   |   |   |      |   |
|-----------|--------|--------------|---|---|----|-----|-----|-----|-----|-----|----|---|---|----|---|-----|----|----|-----|------|---|------|---|---|---|---|------|---|
| MV/MMF 22 | 1 cap  | 318 (200/22) | 2 | 6 | 18 | 1.6 | 1.5 | 150 | 500 | 2.6 | 80 | 0 | 5 | 15 | 0 | 200 | 28 | 10 | 100 | 1000 | 0 | 1.09 | 0 | 0 | 0 | 0 | 62.6 | 0 |
| SIF 1     | 1 pill | 0            | 0 | 0 | 0  | 0   | 0   | 0   | 500 | 0   | 0  | 0 | 0 | 0  | 0 | 0   | 0  | 0  | 0   | 0    | 0 | 0    | 0 | 0 | 0 | 0 | 0    | 0 |
| SIF 2     | 1 pill | 0            | 0 | 0 | 0  | 0   | 0   | 0   | 500 | 0   | 0  | 0 | 0 | 0  | 0 | 0   | 0  | 0  | 0   | 0    | 0 | 0    | 0 | 0 | 0 | 0 | 0    | 0 |
| SIF 3     | 1 pill | 0            | 0 | 0 | 0  | 0   | 0   | 0   | 400 | 0   | 0  | 0 | 0 | 0  | 0 | 0   | 0  | 0  | 0   | 0    | 0 | 0    | 0 | 0 | 0 | 0 | 0    | 0 |
| SIF 4     | 1 pill | 0            | 0 | 0 | 0  | 0   | 0   | 0   | 500 | 0   | 0  | 0 | 0 | 0  | 0 | 0   | 0  | 0  | 0   | 0    | 0 | 0    | 0 | 0 | 0 | 0 | 0    | 0 |
| SIF 5     | 1 pill | 0            | 0 | 0 | 0  | 0   | 0   | 0   | 0   | 0   | 0  | 0 | 0 | 0  | 0 | 200 | 0  | 0  | 0   | 0    | 0 | 0    | 0 | 0 | 0 | 0 | 0    | 0 |

Legend: Cap, capsule; Ca, calcium; Co, cobalt; Cr, chromium; Cu, copper; DHA, docosahexaenoic acid; EPA, eicosapentaenoic acid; Fe, iron; I, iodine; K, potassium; Mg, magnesium; Mn, manganese; Mo, molybdenum; MV/MMF, multivitamin/multimineral formulation; P, phosphorus; RDD, recommended daily dose; Se, selenium; SIF, single ingredient formulation; Vit, vitamin; Zn, zinc.

**Table S2.** Calculated percentiles for Zinc and Manganese urinary concentrations.

|             |                  | ETEs (µg/L) |       |
|-------------|------------------|-------------|-------|
|             |                  | Mn          | Zn    |
| Percentiles | 5 <sup>th</sup>  | 0.14        | 53.0  |
|             | 10 <sup>th</sup> | 0.30        | 82.8  |
|             | 15 <sup>th</sup> | 0.45        | 104.0 |
|             | 20 <sup>th</sup> | 0.58        | 121.7 |
|             | 25 <sup>th</sup> | 0.71        | 145.8 |
|             | 30 <sup>th</sup> | 0.86        | 163.6 |
|             | 35 <sup>th</sup> | 1.02        | 183.9 |
|             | 40 <sup>th</sup> | 1.22        | 209.2 |
|             | 45 <sup>th</sup> | 1.42        | 234.8 |
|             | 50 <sup>th</sup> | 1.67        | 256.9 |
|             | 55 <sup>th</sup> | 1.89        | 282.7 |
|             | 60 <sup>th</sup> | 2.11        | 317.6 |
|             | 65 <sup>th</sup> | 2.46        | 353.1 |
|             | 70 <sup>th</sup> | 2.70        | 410.2 |
|             | 75 <sup>th</sup> | 3.05        | 446.7 |
|             | 80 <sup>th</sup> | 3.55        | 501.9 |
|             | 85 <sup>th</sup> | 4.07        | 550.1 |
|             | 90 <sup>th</sup> | 4.85        | 638.5 |
|             | 95 <sup>th</sup> | 5.95        | 839.3 |

Legend: ETEs, essential trace elements; Mn, manganese; Zn, zinc.

**Table S3.** Sociodemographic characteristics of pregnant women by urinary levels of ETes.

| Characteristics                            | n   | %  | Co (µg/g) |              |                     | Cu (µg/g) |               |                     | Mn (µg/g) |              |                     | Mo (µg/g) |              |                     | Zn (µg/g) |                |                    |
|--------------------------------------------|-----|----|-----------|--------------|---------------------|-----------|---------------|---------------------|-----------|--------------|---------------------|-----------|--------------|---------------------|-----------|----------------|--------------------|
|                                            |     |    | Median    | (P25; P75)   | <i>p</i>            | Median    | (P25; P75)    | <i>p</i>            | Median    | (P25; P75)   | <i>p</i>            | Median    | (P25; P75)   | <i>p</i>            | Median    | (P25; P75)     | <i>p</i>           |
| Sub-cohort                                 |     |    |           |              |                     |           |               |                     |           |              |                     |           |              |                     |           |                |                    |
| Porto                                      | 337 | 53 | 0.28      | (0.13; 0.49) | <0.001 <sup>a</sup> | 18.98     | (11.50; 35.2) | <0.001 <sup>a</sup> | 3.59      | (2.04; 5.54) | <0.001 <sup>a</sup> | 40.56     | (28.7; 57.3) | <0.001 <sup>a</sup> | 310.33    | (201.0; 497.3) | 0.045 <sup>a</sup> |
| Lisbon                                     | 298 | 47 | 0.39      | (0.28; 0.61) |                     | 10.37     | (8.20; 15.1)  |                     | 0.92      | (0.49; 1.79) |                     | 53.03     | (39.2; 70.0) |                     | 360.57    | (239.9; 510.9) |                    |
| Education level                            |     |    |           |              |                     |           |               |                     |           |              |                     |           |              |                     |           |                |                    |
| Low (≤ 9 years)                            | 155 | 25 | 0.29      | (0.15; 0.47) | <0.001 <sup>b</sup> | 19.28     | (11.2; 32.3)  | <0.001 <sup>b</sup> | 3.50      | (1.86; 5.46) | <0.001 <sup>b</sup> | 38.67     | (27.2; 55.2) | <0.001 <sup>b</sup> | 292.34    | (187.2; 474.5) | 0.016 <sup>b</sup> |
| Medium (10 to 12 years)                    | 181 | 29 | 0.34      | (0.15; 0.65) |                     | 14.68     | (9.90; 24.7)  |                     | 2.45      | (1.33; 4.69) |                     | 44.94     | (31.8; 56.4) |                     | 377.39    | (245.9; 534.0) |                    |
| University (≥ 13 years)                    | 282 | 46 | 0.37      | (0.25; 0.57) |                     | 10.96     | (8.4; 16.1)   |                     | 1.00      | (0.53; 2.21) |                     | 53.62     | (38.7; 70.8) |                     | 339.51    | (223.9; 510.2) |                    |
| Smoking habits                             |     |    |           |              |                     |           |               |                     |           |              |                     |           |              |                     |           |                |                    |
| Non-smoker                                 | 443 | 70 | 0.33      | (0.18; 0.54) | 0.025 <sup>b</sup>  | 13.24     | (9.00; 22.9)  | 0.598 <sup>b</sup>  | 1.85      | (0.82; 3.77) | 0.015 <sup>b</sup>  | 47.82     | (33.7; 64.9) | 0.012 <sup>b</sup>  | 328.03    | (215.8; 504.4) | 0.473 <sup>b</sup> |
| Former smoker                              | 132 | 21 | 0.37      | (0.24; 0.69) |                     | 13.55     | (8.80; 22.4)  |                     | 1.82      | (0.91; 3.94) |                     | 51.49     | (36.4; 65.0) |                     | 337.37    | (241.7; 517.0) |                    |
| Smoker                                     | 56  | 9  | 0.35      | (0.26; 0.51) |                     | 14.99     | (9.40; 23.6)  |                     | 3.46      | (1.19; 5.10) |                     | 39.05     | (30.3; 54.5) |                     | 321.79    | (229.6; 484.4) |                    |
| Pre-pregnancy BMI                          |     |    |           |              |                     |           |               |                     |           |              |                     |           |              |                     |           |                |                    |
| Underweight                                | 35  | 6  | 0.32      | (0.15; 0.68) | 0.058 <sup>b</sup>  | 13.65     | (10.0; 17.4)  | 0.940 <sup>b</sup>  | 2.54      | (1.27; 4.28) | 0.236 <sup>b</sup>  | 51.44     | (33.7; 69.9) | <0.001 <sup>b</sup> | 376.25    | (236.8; 568.0) | 0.829 <sup>b</sup> |
| Normal weight                              | 400 | 63 | 0.36      | (0.22; 0.59) |                     | 13.57     | (9.10; 23.9)  |                     | 2.04      | (0.90; 4.25) |                     | 49.76     | (35.9; 68.2) |                     | 325.95    | (223.3; 507.6) |                    |
| Overweight                                 | 114 | 18 | 0.31      | (0.17; 0.49) |                     | 13.66     | (9.50; 21.2)  |                     | 1.93      | (0.80; 3.24) |                     | 44.36     | (32.0; 56.8) |                     | 339.12    | (230.0; 497.3) |                    |
| Obese                                      | 85  | 13 | 0.30      | (0.17; 0.46) |                     | 13.80     | (8.50; 24.4)  |                     | 1.72      | (0.78; 3.47) |                     | 38.45     | (30.5; 53.2) |                     | 314.97    | (200.6; 518.2) |                    |
| 1 <sup>st</sup> trimester weight variation |     |    |           |              |                     |           |               |                     |           |              |                     |           |              |                     |           |                |                    |
| Below adequacy                             | 132 | 21 | 0.32      | (0.17; 0.48) | 0.093 <sup>b</sup>  | 14.47     | (9.60; 27.6)  | 0.292 <sup>b</sup>  | 1.79      | (0.85; 4.04) | 0.729 <sup>b</sup>  | 44.45     | (32.6; 61.9) | 0.145 <sup>b</sup>  | 343.24    | (239.7; 517.6) | 0.347 <sup>b</sup> |
| Adequate                                   | 189 | 31 | 0.34      | (0.20; 0.55) |                     | 13.49     | (9.30; 21.8)  |                     | 2.18      | (0.90; 4.03) |                     | 49.35     | (37.2; 67.3) |                     | 326.37    | (236.4; 517.3) |                    |
| Above adequacy                             | 293 | 48 | 0.36      | (0.21; 0.58) |                     | 12.93     | (8.80; 21.1)  |                     | 1.87      | (0.89; 4.08) |                     | 47.86     | (33.1; 63.1) |                     | 322.37    | (199.2; 491.1) |                    |

Legend: Co, cobalt; Cu, copper; ETes, essential trace elements; Mn, manganese; Mo, molybdenum; Zn, zinc.  
<sup>a</sup>Mann-Whitney.  
<sup>b</sup>Kruskal-Wallis.

**Table S4.** Urinary concentrations of ETEs in the 1st trimester by frequency of intake of dairy products, eggs, fish, seafood, offal, leguminous and nuts.

| Food intake               | n   | %    | Co (µg/g) |              |                    | Cu (µg/g) |               |                    | Mn (µg/g) |              |                    | Mo (µg/g) |              |                    | Zn (µg/g) |                |                    |
|---------------------------|-----|------|-----------|--------------|--------------------|-----------|---------------|--------------------|-----------|--------------|--------------------|-----------|--------------|--------------------|-----------|----------------|--------------------|
|                           |     |      | Median    | (P25; P75)   | <i>p</i>           | Median    | (P25; P75)    | <i>p</i>           | Median    | (P25; P75)   | <i>p</i>           | Median    | (P25; P75)   | <i>p</i>           | Median    | (P25; P75)     | <i>p</i>           |
| Milk                      |     |      |           |              |                    |           |               |                    |           |              |                    |           |              |                    |           |                |                    |
| < 3 times a month         | 178 | 28.4 | 0.33      | (0.19; 0.58) | 0.610 <sup>a</sup> | 13.57     | (8.98; 23.9)  | 0.437 <sup>a</sup> | 1.76      | (0.65; 3.73) | 0.019 <sup>a</sup> | 49.24     | (34.5; 68.2) | 0.741 <sup>a</sup> | 382.52    | (263.1; 529.8) | 0.039 <sup>a</sup> |
| 1 a 6 times a week        | 157 | 25.0 | 0.32      | (0.19; 0.54) |                    | 12.51     | (8.90; 21.5)  |                    | 1.80      | (0.91; 3.71) |                    | 47.96     | (34.2; 61.5) |                    | 304.30    | (202.1; 476.7) |                    |
| 1 time a day              | 216 | 34.4 | 0.36      | (0.20; 0.54) |                    | 13.94     | (9.00; 23.5)  |                    | 2.17      | (0.92; 4.03) |                    | 47.23     | (34.2; 62.0) |                    | 317.20    | (215.3; 479.2) |                    |
| ≥ 2 times a day           | 76  | 12.1 | 0.37      | (0.20; 0.59) |                    | 14.52     | (9.69; 23.2)  |                    | 2.40      | (1.12; 4.98) |                    | 44.73     | (30.7; 63.4) |                    | 322.43    | (211.3; 585.5) |                    |
| Yoghurt                   |     |      |           |              |                    |           |               |                    |           |              |                    |           |              |                    |           |                |                    |
| < 3 times a month         | 106 | 16.9 | 0.34      | (0.21; 0.54) | 0.841 <sup>a</sup> | 13.50     | (9.42; 23.1)  | 0.024 <sup>a</sup> | 1.83      | (0.65; 3.99) | 0.015 <sup>a</sup> | 46.33     | (32.4; 65.4) | 0.792 <sup>a</sup> | 340.57    | (259.1; 498.6) | 0.630 <sup>a</sup> |
| 1 a 6 times a week        | 274 | 43.7 | 0.35      | (0.20; 0.55) |                    | 12.47     | (8.72; 20.6)  |                    | 1.76      | (0.80; 3.45) |                    | 46.46     | (34.4; 62.0) |                    | 322.52    | (203.8; 498.2) |                    |
| 1 time a day              | 182 | 29.0 | 0.35      | (0.19; 0.59) |                    | 14.46     | (8.89; 25.6)  |                    | 2.15      | (0.91; 4.75) |                    | 48.89     | (34.4; 67.2) |                    | 354.57    | (228.8; 539.9) |                    |
| ≥ 2 times a day           | 65  | 10.4 | 0.36      | (0.16; 0.53) |                    | 15.74     | (10.4; 26.4)  |                    | 2.78      | (1.16; 4.97) |                    | 48.22     | (33.5; 63.3) |                    | 322.37    | (207.9; 528.7) |                    |
| Cheese                    |     |      |           |              |                    |           |               |                    |           |              |                    |           |              |                    |           |                |                    |
| < 3 times a month         | 97  | 15.5 | 0.35      | (0.20; 0.53) | 0.453 <sup>a</sup> | 13.24     | (8.47; 23.9)  | 0.008 <sup>a</sup> | 1.69      | (0.84; 3.45) | 0.196 <sup>a</sup> | 48.22     | (32.4; 64.4) | 0.692 <sup>a</sup> | 348.56    | (231.4; 559.8) | 0.612 <sup>a</sup> |
| 1 a 6 times a week        | 341 | 54.5 | 0.34      | (0.20; 0.57) |                    | 13.89     | (9.52; 22.7)  |                    | 2.13      | (0.92; 4.07) |                    | 47.37     | (34.2; 62.0) |                    | 326.37    | (228.5; 515.2) |                    |
| 1 time a day              | 140 | 22.4 | 0.33      | (0.18; 0.53) |                    | 11.58     | (8.20; 19.0)  |                    | 1.80      | (0.73; 3.55) |                    | 47.26     | (35.2; 66.2) |                    | 316.58    | (206.6; 475.0) |                    |
| ≥ 2 times a day           | 48  | 7.7  | 0.39      | (0.26; 0.62) |                    | 17.32     | (10.87; 26.9) |                    | 2.61      | (1.29; 4.28) |                    | 52.92     | (35.6; 64.4) |                    | 382.13    | (233.9; 512.5) |                    |
| Eggs                      |     |      |           |              |                    |           |               |                    |           |              |                    |           |              |                    |           |                |                    |
| < 3 times a month         | 126 | 20.2 | 0.32      | (0.19; 0.53) | 0.380 <sup>a</sup> | 14.53     | (8.91; 23.0)  | 0.271 <sup>a</sup> | 2.56      | (1.08; 4.75) | 0.004 <sup>a</sup> | 44.67     | (32.1; 58.3) | 0.100 <sup>a</sup> | 330.46    | (232.9; 498.6) | 0.853 <sup>a</sup> |
| 1 a 3 times a week        | 410 | 65.6 | 0.35      | (0.19; 0.55) |                    | 13.68     | (9.35; 23.6)  |                    | 1.93      | (0.89; 3.99) |                    | 48.17     | (34.4; 64.9) |                    | 331.24    | (220.1; 505.6) |                    |
| ≥ 4 times a week          | 89  | 14.2 | 0.38      | (0.23; 0.59) |                    | 12.42     | (8.60; 18.1)  |                    | 1.37      | (0.61; 2.77) |                    | 49.80     | (37.1; 69.8) |                    | 361.72    | (232.9; 542.4) |                    |
| Fish                      |     |      |           |              |                    |           |               |                    |           |              |                    |           |              |                    |           |                |                    |
| < 3 times a month         | 71  | 11.6 | 0.34      | (0.17; 0.54) | 0.555 <sup>a</sup> | 14.62     | (8.72; 25.6)  | 0.266 <sup>a</sup> | 2.31      | (0.87; 4.17) | 0.011 <sup>a</sup> | 42.68     | (32.1; 59.3) | 0.129 <sup>a</sup> | 376.31    | (240.7; 491.5) | 0.755 <sup>a</sup> |
| 1 a 3 times a week        | 407 | 66.6 | 0.34      | (0.19; 0.57) |                    | 13.42     | (9.46; 21.7)  |                    | 1.98      | (0.90; 4.07) |                    | 47.96     | (34.2; 63.5) |                    | 326.37    | (216.5; 515.2) |                    |
| ≥ 4 times a week          | 133 | 21.8 | 0.38      | (0.24; 0.55) |                    | 12.48     | (8.38; 20.6)  |                    | 1.46      | (0.71; 2.96) |                    | 50.65     | (34.7; 66.1) |                    | 321.39    | (236.9; 476.8) |                    |
| Seafood                   |     |      |           |              |                    |           |               |                    |           |              |                    |           |              |                    |           |                |                    |
| do not eat Seafood at all | 180 | 60.8 | 0.39      | (0.28; 0.62) | 0.933 <sup>b</sup> | 10.39     | (8.20; 15.2)  | 0.980 <sup>b</sup> | 0.92      | (0.49; 1.82) | 0.413 <sup>b</sup> | 53.40     | (41.5; 74.5) | 0.092 <sup>b</sup> | 363.32    | (262.1; 510.6) | 0.294 <sup>b</sup> |
| ≥ 1 time a month          | 116 | 39.2 | 0.39      | (0.27; 0.61) |                    | 10.36     | (8.33; 15.1)  |                    | 0.91      | (0.49; 1.52) |                    | 51.18     | (38.3; 65.3) |                    | 331.08    | (222.0; 528.9) |                    |
| Offal                     |     |      |           |              |                    |           |               |                    |           |              |                    |           |              |                    |           |                |                    |

|            |                         |     |      |      |              |                    |       |              |                    |      |              |                    |       |              |                    |        |                |                    |
|------------|-------------------------|-----|------|------|--------------|--------------------|-------|--------------|--------------------|------|--------------|--------------------|-------|--------------|--------------------|--------|----------------|--------------------|
| Leguminous | do not eat Offal at all | 228 | 80.0 | 0.40 | (0.28; 0.61) | 0.400 <sup>b</sup> | 10.39 | (8.23; 14.9) | 0.901 <sup>b</sup> | 0.93 | (0.50; 1.82) | 0.854 <sup>b</sup> | 53.34 | (40.3; 70.1) | 0.323 <sup>b</sup> | 361.60 | (249.0; 510.6) | 0.950 <sup>b</sup> |
|            | ≥ 1 time a month        | 57  | 20.0 | 0.33 | (0.26; 0.60) |                    | 10.24 | (8.22; 15.1) |                    | 0.93 | (0.48; 1.75) |                    | 51.46 | (36.4; 67.9) |                    | 372.57 | (225.7; 556.6) |                    |
|            | < 3 times a month       | 58  | 20.4 | 0.40 | (0.25; 0.57) | 0.713 <sup>a</sup> | 9.36  | (7.82; 13.1) | 0.158 <sup>a</sup> | 0.73 | (0.46; 1.68) | 0.257 <sup>a</sup> | 44.89 | (34.9; 59.0) | 0.003 <sup>a</sup> | 339.12 | (242.8; 463.5) | 0.773 <sup>a</sup> |
|            | 1 a 3 times a week      | 160 | 56.3 | 0.38 | (0.29; 0.61) |                    | 10.78 | (8.27; 15.3) |                    | 0.94 | (0.49; 2.04) |                    | 53.47 | (40.3; 71.1) |                    | 352.32 | (245.0; 521.7) |                    |
| Nuts       | ≥ 4 times a week        | 66  | 23.2 | 0.42 | (0.27; 0.67) | 0.903 <sup>a</sup> | 10.40 | (8.78; 15.3) | 0.074 <sup>a</sup> | 1.11 | (0.59; 1.70) | 0.274 <sup>a</sup> | 56.13 | (46.9; 76.7) | 0.151 <sup>a</sup> | 375.61 | (237.4; 550.7) | 0.573 <sup>a</sup> |
|            | < 3 times a month       | 82  | 29.0 | 0.38 | (0.28; 0.59) |                    | 9.44  | (7.82; 13.4) |                    | 0.80 | (0.47; 1.46) |                    | 52.18 | (41.8; 77.4) |                    | 372.10 | (239.9; 498.6) |                    |
|            | 1 a 3 times a week      | 108 | 38.2 | 0.39 | (0.28; 0.60) | 0.903 <sup>a</sup> | 10.84 | (8.33; 14.9) |                    | 0.94 | (0.49; 1.83) |                    | 49.49 | (37.0; 65.5) |                    | 340.57 | (223.8; 516.0) |                    |
|            | ≥ 4 times a week        | 93  | 32.9 | 0.41 | (0.27; 0.64) |                    | 11.39 | (8.78; 16.0) |                    | 1.07 | (0.51; 2.15) |                    | 54.59 | (42.7; 71.7) |                    | 373.83 | (268.5; 550.7) |                    |

Legend: Co, cobalt; Cu, copper; ETes, essential trace elements; Mn, manganese; Mo, molybdenum; Zn, zinc.  
<sup>a</sup>Kruskal-Wallis.  
<sup>b</sup>Mann-Whitney.

**Table S5.** Servings of food groups considered in the questionnaire.

| Food group | Serving                                          |
|------------|--------------------------------------------------|
| Milk       | 1 cup (250 ml)                                   |
| Yogurt     | 1 solid yogurt (150 g) or liquid yogurt (180 ml) |
| Cheese     | 2 slices of cheese (40 g)                        |
| Eggs       | 1 egg (56 g)                                     |
| Fish       | 1 fish fillet (125 g)                            |
| Seafood    | Not specified                                    |
| Offal      | ¼ of a plate (90 g)                              |
| Leguminous | 3 tablespoons (80 g)                             |
| Nuts       | 1 full hand (25 g)                               |

**Table S6.** Association between first trimester urinary ETes levels and pregnancy complications.

| ETes (µg/g) | Uncomplicated pregnancy (n = 476) |       |       | Pregnancy complications (n = 120) |       |       | <i>p</i> <sup>a</sup> |
|-------------|-----------------------------------|-------|-------|-----------------------------------|-------|-------|-----------------------|
|             | Median                            | P25   | P75   | Median                            | P25   | P75   |                       |
| Co          | 0.35                              | 0.21  | 0.57  | 0.31                              | 0.19  | 0.53  | 0.162                 |
| Cu          | 13.7                              | 8.98  | 24.0  | 12.4                              | 8.8   | 18.0  | 0.080                 |
| Mn          | 1.92                              | 0.85  | 4.05  | 1.53                              | 0.70  | 3.44  | 0.052                 |
| Mo          | 47.7                              | 33.9  | 63.3  | 48.5                              | 34.5  | 64.9  | 0.900                 |
| Zn          | 327.1                             | 216.4 | 507.9 | 365.1                             | 240.0 | 548.5 | 0.199                 |

Legend: Co, cobalt; Cu, copper; ETes, essential trace elements; Mn, manganese; Mo, molybdenum; Zn, zinc.

<sup>a</sup>Mann-Whitney.

**Table S7.** First-trimester maternal urinary Mn and Zn concentrations according to the type of pregnancy complication.

| Type of pregnancy complications | n   | %   | Mn (µg/g) |            |                       | Zn (µg/g) |            |                       |       |
|---------------------------------|-----|-----|-----------|------------|-----------------------|-----------|------------|-----------------------|-------|
|                                 |     |     | Median    | (P25; P75) | <i>p</i> <sup>a</sup> | Median    | (P25; P75) | <i>p</i> <sup>a</sup> |       |
| PE                              | No  | 579 | 97.3      | 1.85       | (0.84; 3.94)          | 0.007     | 334.47     | (220.2; 513.2)        | 0.377 |
|                                 | Yes | 16  | 2.7       | 0.87       | (0.44; 1.56)          |           | 357.48     | (281; 563.5)          |       |
| PTB                             | No  | 571 | 95.8      | 1.82       | (0.78; 3.86)          | 0.261     | 338.97     | (224.1; 513.2)        | 0.493 |
|                                 | Yes | 25  | 4.2       | 2.17       | (1.08; 4.08)          |           | 288.52     | (146.2; 548.4)        |       |

Legend: Co, cobalt; Cu, copper; ETes, essential trace elements; Mn, manganese; Mo, molybdenum; PE, preeclampsia; PTB, preterm birth; Zn, zinc.

<sup>a</sup>Mann-Whitney.



**Table S8.** Association between first trimester urinary ETes levels and neonatal outcomes.

| Neonatal out-comes                | n   | %  | Co (µg/g) |              |                    | Cu (µg/g) |              |                    | Mn (µg/g) |              |                    | Mo (µg/g) |              |                    | Zn (µg/g) |                |                    |
|-----------------------------------|-----|----|-----------|--------------|--------------------|-----------|--------------|--------------------|-----------|--------------|--------------------|-----------|--------------|--------------------|-----------|----------------|--------------------|
|                                   |     |    | Median    | (P25; P75)   | <i>p</i>           | Median    | (P25; P75)     | <i>p</i>           |
| Birth weight adequacy             |     |    |           |              |                    |           |              |                    |           |              |                    |           |              |                    |           |                |                    |
| SGA                               | 34  | 5  | 0.29      | (0.15; 0.50) |                    | 13.85     | (9.35; 21.1) |                    | 3.22      | (1.36; 4.34) |                    | 49.45     | (36.4; 65.6) |                    | 301.58    | (173.8; 382.5) |                    |
| AGA                               | 580 | 91 | 0.35      | (0.20; 0.57) | 0.099 <sup>a</sup> | 13.68     | (9.01; 23.1) | 0.863 <sup>a</sup> | 1.92      | (0.86; 3.95) | 0.096 <sup>a</sup> | 47.06     | (33.3; 63.2) | 0.807 <sup>a</sup> | 334.48    | (225.7; 521.0) | 0.132 <sup>a</sup> |
| LGA                               | 20  | 3  | 0.30      | (0.13; 0.44) |                    | 12.32     | (10.0; 15.6) |                    | 1.68      | (0.72; 2.97) |                    | 50.46     | (40.7; 63.5) |                    | 375.21    | (272.0; 461.1) |                    |
| Birth head circumference adequacy |     |    |           |              |                    |           |              |                    |           |              |                    |           |              |                    |           |                |                    |
| SGA                               | 32  | 5  | 0.27      | (0.14; 0.42) |                    | 14.30     | (9.12; 17.8) |                    | 2.79      | (1.06; 4.41) |                    | 47.85     | (27.0; 64.9) |                    | 252.26    | (166.2; 422.3) |                    |
| AGA                               | 523 | 86 | 0.35      | (0.20; 0.57) | 0.117 <sup>a</sup> | 13.66     | (8.98; 23.1) | 0.451 <sup>a</sup> | 2.05      | (0.86; 3.96) | 0.042 <sup>a</sup> | 47.10     | (33.6; 63.5) | 0.520 <sup>a</sup> | 341.90    | (223.9; 513.2) | 0.112 <sup>a</sup> |
| LGA                               | 56  | 9  | 0.29      | (0.18; 0.50) |                    | 12.08     | (9.25; 20.6) |                    | 1.43      | (0.71; 2.70) |                    | 49.46     | (35.7; 61.2) |                    | 364.84    | (262.7; 559.2) |                    |
| Birth length adequacy             |     |    |           |              |                    |           |              |                    |           |              |                    |           |              |                    |           |                |                    |
| SGA                               | 49  | 8  | 0.33      | (0.21; 0.48) |                    | 13.50     | (8.97; 17.1) |                    | 1.82      | (0.74; 3.53) |                    | 48.22     | (34.5; 61.8) |                    | 299.88    | (250.4; 465.6) |                    |
| AGA                               | 570 | 91 | 0.35      | (0.19; 0.57) | 0.676 <sup>b</sup> | 13.65     | (9.12; 23.2) | 0.301 <sup>b</sup> | 2.05      | (0.87; 4.07) | 0.376 <sup>b</sup> | 47.57     | (33.5; 63.4) | 0.857 <sup>b</sup> | 342.04    | (220.2; 517.1) | 0.716 <sup>b</sup> |
| LGA                               | 4   | 1  | nd        | nd           |                    | nd        | nd             |                    |

Legend: AGA, adequate for gestational age; ETes, essential trace elements; LGA, large for gestational age; nd, not determined due to small sample size; SGA, small for gestational age.  
<sup>a</sup>Kruskal-Wallis.  
<sup>b</sup>Mann-Whitney.

**Table S9.** Urinary cobalt, copper, manganese, molybdenum and zinc concentrations, as median or mean, among pregnant women and general adult population reported in our cohort and in literature.

| ETEs concentrations (µg/L) |                                      |                                               |                       |
|----------------------------|--------------------------------------|-----------------------------------------------|-----------------------|
| ETEs                       | IoMum<br>(1 <sup>st</sup> Trimester) | Pregnant women<br>(1 <sup>st</sup> Trimester) | General population    |
| Cobalt                     | 0.31 <sup>a</sup>                    | 0.40 <sup>a41</sup><br>0.42 <sup>a42</sup>    | 0.18 <sup>a44</sup>   |
|                            |                                      |                                               | 0.30 <sup>a45</sup>   |
|                            |                                      |                                               | 0.39 <sup>b46</sup>   |
|                            |                                      |                                               | 0.70 <sup>a47</sup>   |
| Copper                     | 11.1 <sup>a</sup>                    | 15.0 <sup>a41</sup>                           | 8.18 <sup>a44</sup>   |
|                            |                                      |                                               | 6.90 <sup>a45</sup>   |
|                            |                                      |                                               | 9.00 <sup>b46</sup>   |
|                            |                                      |                                               | 14.9 <sup>a46</sup>   |
| Manganese                  | 1.67 <sup>a</sup>                    | 0.20 <sup>a41</sup>                           | < 0.04 <sup>a44</sup> |
|                            |                                      |                                               | 0.31 <sup>a45</sup>   |
|                            |                                      |                                               | 0.09 <sup>b46</sup>   |
|                            |                                      |                                               | 0.16 <sup>a46</sup>   |
| Molybdenum                 | 39.3 <sup>a</sup>                    | 38.5 <sup>a43</sup>                           | 31.3 <sup>a44</sup>   |
|                            |                                      |                                               | 20.0 <sup>a45</sup>   |
|                            |                                      |                                               | 38.0 <sup>b46</sup>   |
| Zinc                       | 256.9 <sup>a</sup>                   | 290.0 <sup>a41</sup>                          | 256.0 <sup>a44</sup>  |
|                            |                                      |                                               | 195.0 <sup>a45</sup>  |
|                            |                                      |                                               | 269.0 <sup>b46</sup>  |

Legend: ETEs, essential trace elements.

<sup>a</sup>Median.

<sup>b</sup>Mean.

**Table S10.** Maternal urinary concentrations of Co, Cu, Mn and Zn in the 1<sup>st</sup> trimester according to food supplement use.

| Supplementation | n   | %    | Co (µg/g) |              |                       | Cu (µg/g) |              |                       | Mn (µg/g) |              |                       | Zn (µg/g) |                |                       |
|-----------------|-----|------|-----------|--------------|-----------------------|-----------|--------------|-----------------------|-----------|--------------|-----------------------|-----------|----------------|-----------------------|
|                 |     |      | Median    | (P25; P75)   | <i>p</i> <sup>a</sup> | Median    | (P25; P75)   | <i>p</i> <sup>a</sup> | Median    | (P25; P75)   | <i>p</i> <sup>a</sup> | Median    | (P25; P75)     | <i>p</i> <sup>a</sup> |
| NS              | 23  | 4.3  | 0.38      | (0.29; 0.68) | 0.707                 | 19.28     | (11.8; 34.9) | 0.004                 | 2.75      | (1.93; 4.98) | <0.001                | 299.88    | (215.8; 603)   | 0.550                 |
| MV/MMF          | 249 | 46.0 | 0.38      | (0.24; 0.58) |                       | 11.59     | (8.38; 19.3) |                       | 1.38      | (0.61; 2.82) |                       | 374.44    | (239.9; 548.4) |                       |

Legend: Co, cobalt; Cu, copper; Mn, manganese; Mo, molybdenum; MV/MMF, multivitamin/multimineral formulation users; NS, non-users of supplements; Zn, zinc.

<sup>a</sup>Mann-Whitney.
